# Supplementary material for: A Self-Emulsified Adjuvant System Containing the Immune Potentiator Alpha Tocopherol Induces Higher Neutralizing Antibody Responses than a Squalene-Only Emulsion When Evaluated with a Recombinant Cytomegalovirus (CMV) Pentamer Antigen in Mice
Source: MDPI journal article supplement (doi:10.3390/pharmaceutics15010238), 2023-01-10
Supplement: s1 [file s1]

## Supplementary Figures and Tables

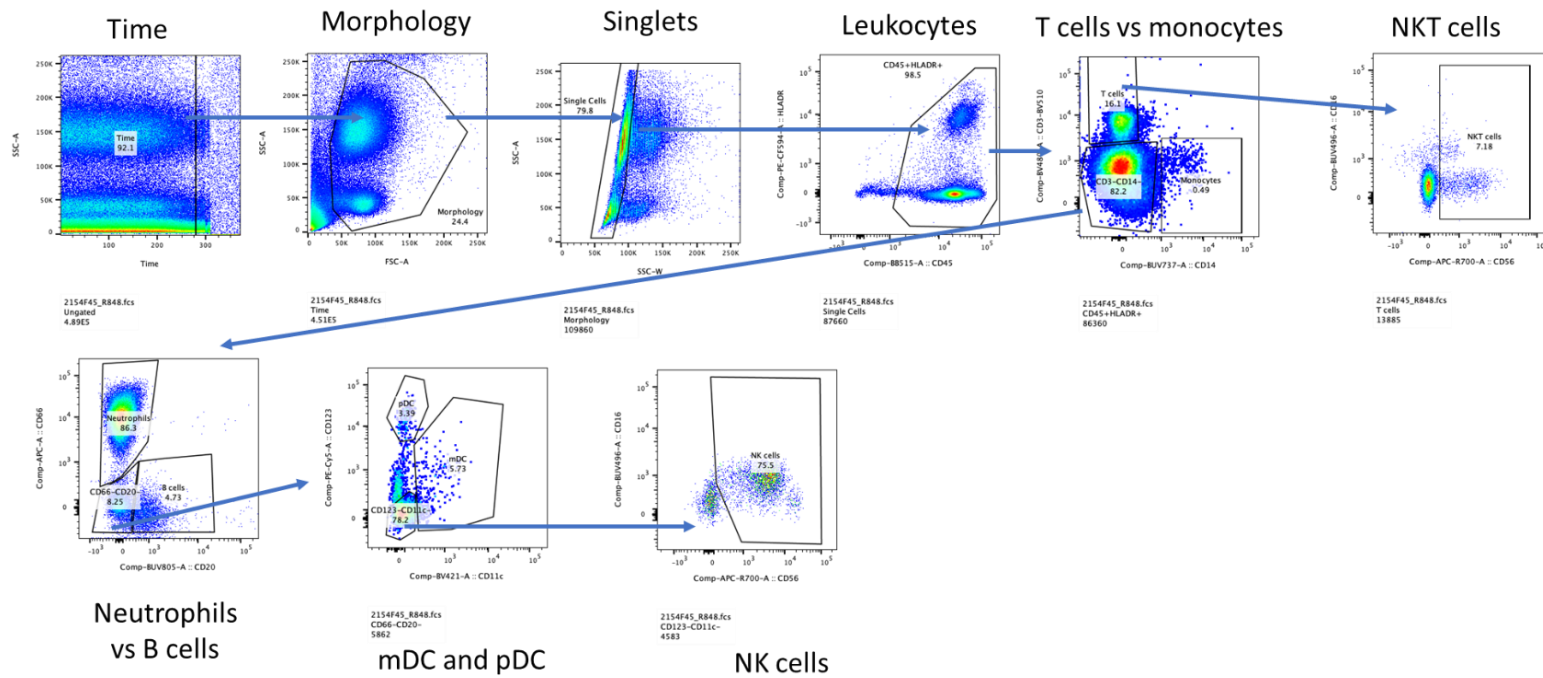

(a)

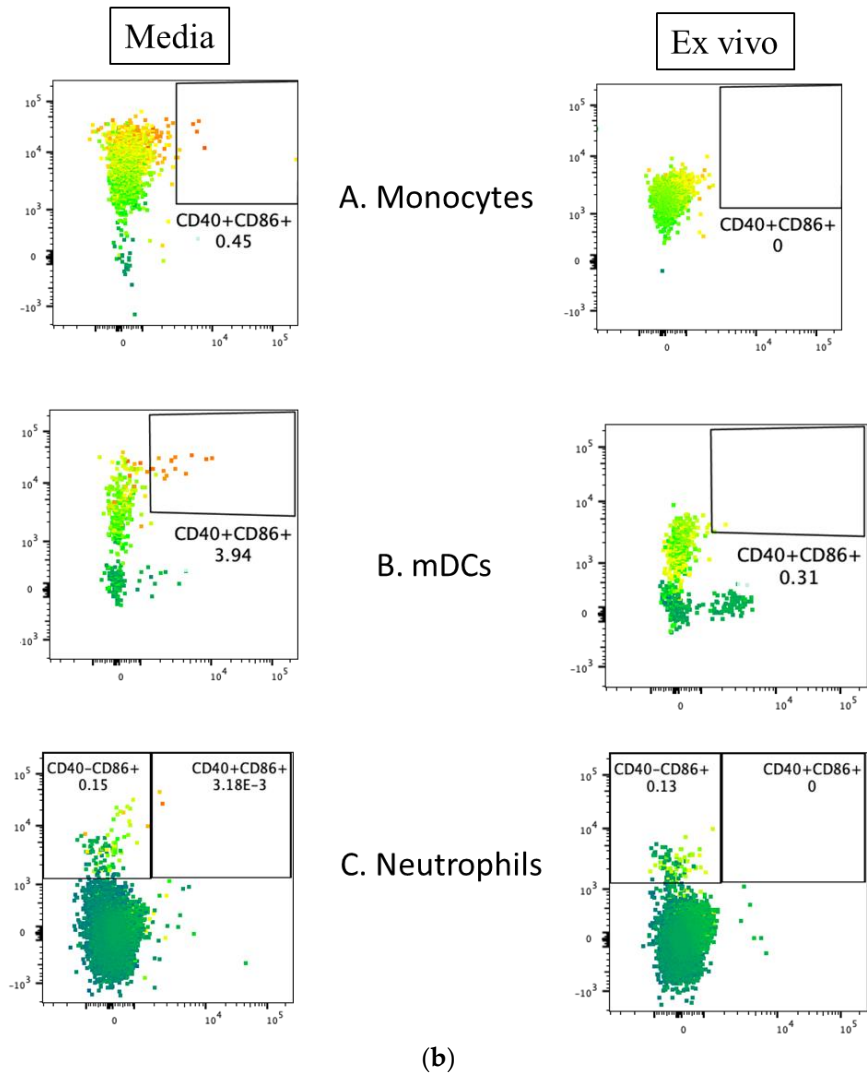

**Figure S1. (a):** Example of gating strategy for in vitro staining of human whole blood cells. T cells vs monocytes are identified after gating the leukocytes. Monocytes are further gated into Neutrophils, mDCs and NK cells. **(b):** Media and ex vivo staining for each cell type from Monocytes (A), mDCs (B) and Neutrophils (C).

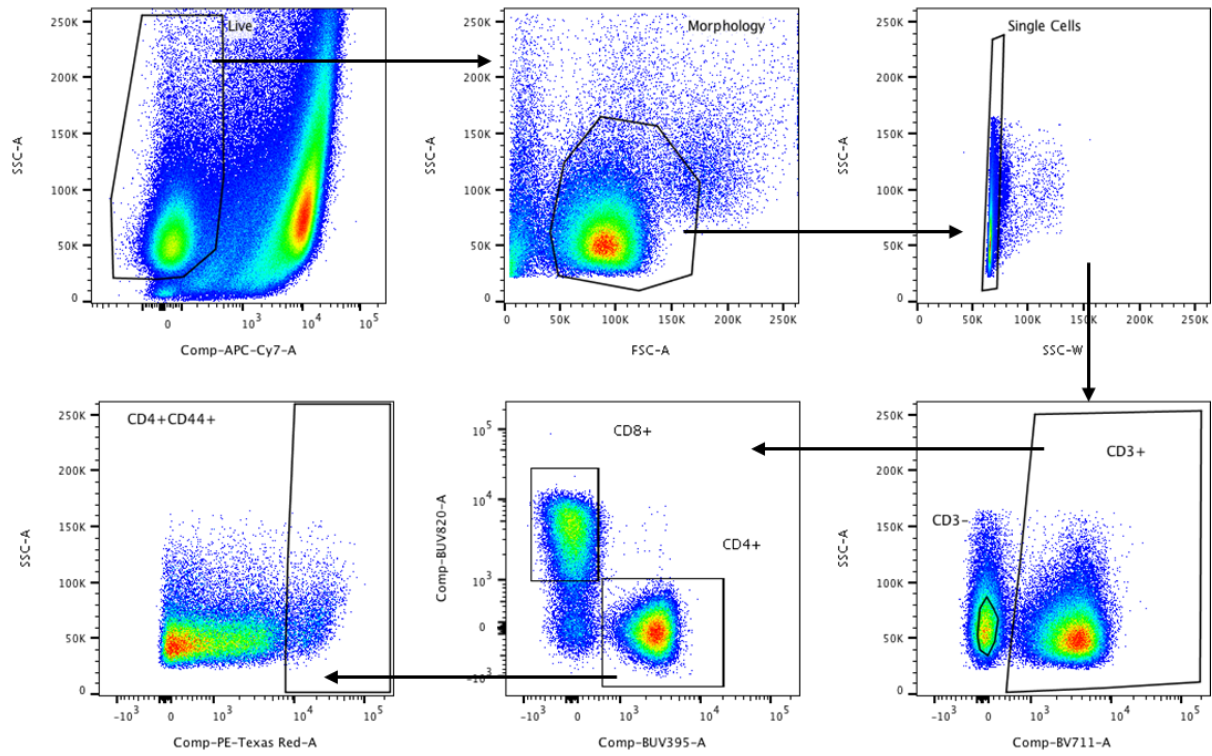

(a)

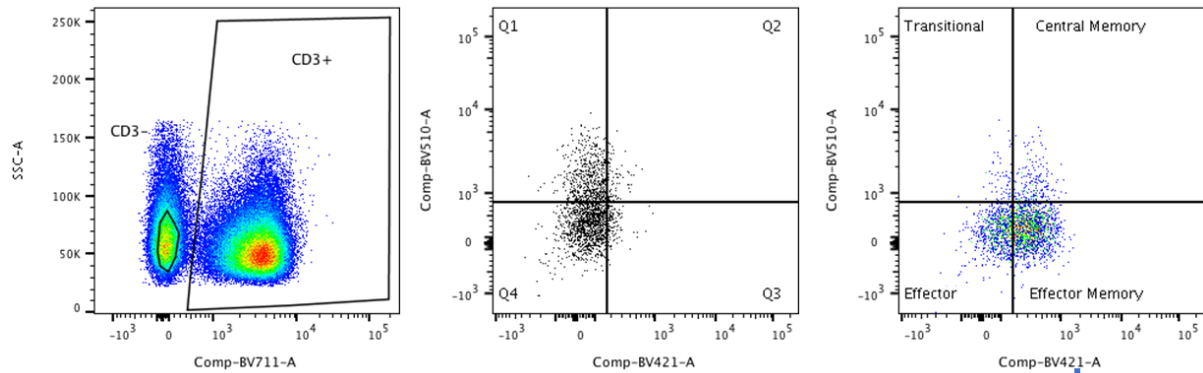

Cells from each quadrant are then gated for CD4+CD44+cytokine+ cells or CD8+CD44+cytokine+ cells as explained in Figure 2a

(b)

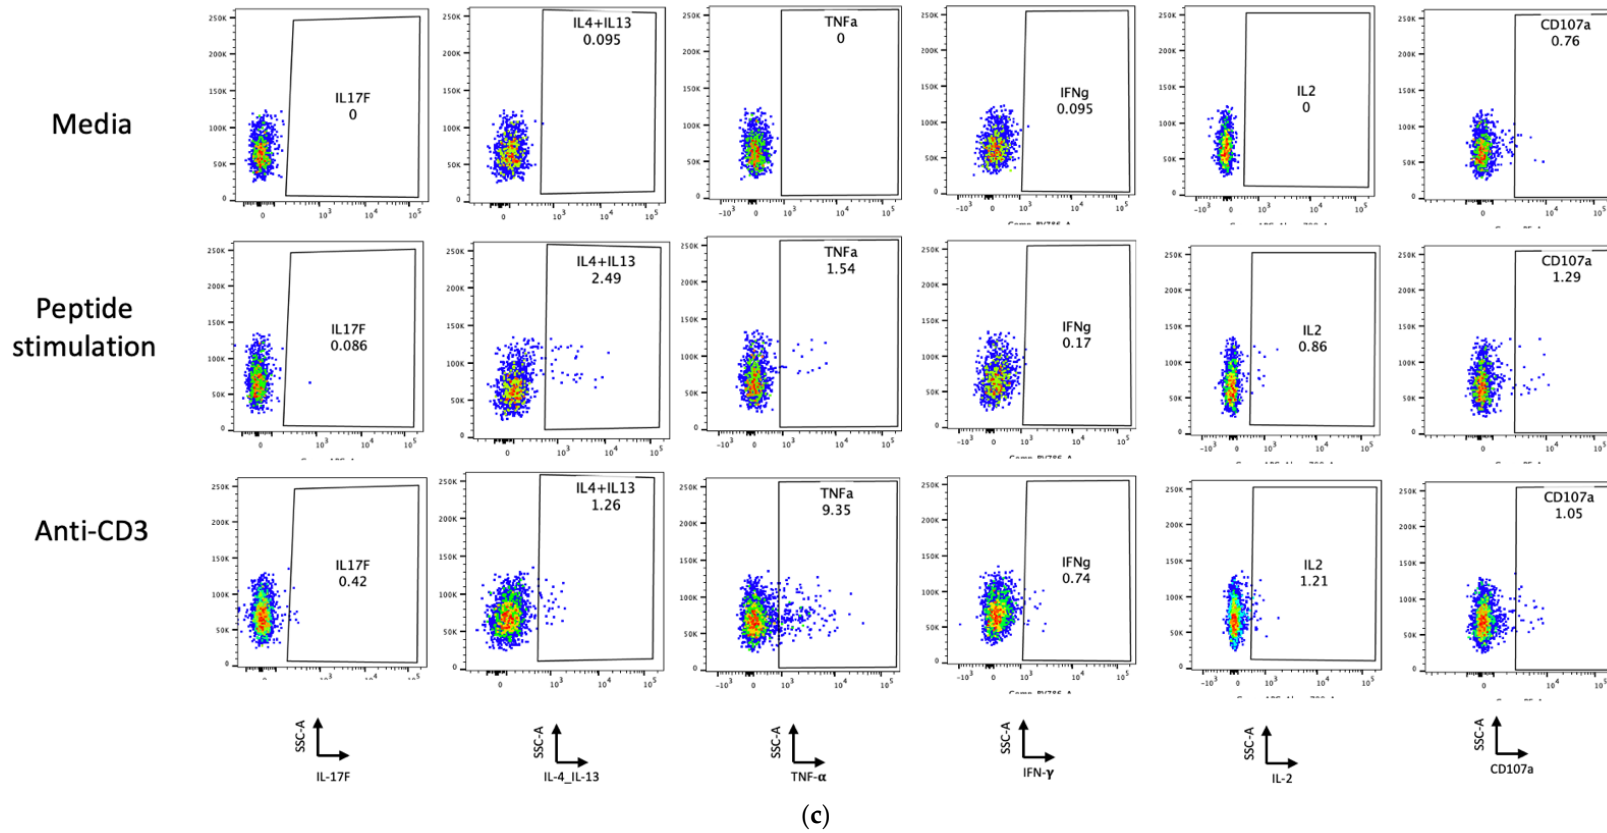

**Figure S2.** (a): Example of gating strategy for ICS. First live cells are differentiated from dead, and then separated based on morphology to get single cell lymphocytes, differentiated based on CD3 marker. CD4<sup>+</sup> and CD8<sup>+</sup> T cells are then gated based on CD3 gates followed by identifying antigen specific CD4<sup>+</sup> or CD8<sup>+</sup> T cells. (b): Example of gating strategy for Memory markers. CD3<sup>+</sup> cells are used to gate four quadrants of T lymphocyte cells based on CD62L and CD127 markers. Q1 represents transitional T cells, Q2 represents Central Memory T cells, Q3 represents Effector memory and Q4 represents Effector cells. (c): Representative ICS staining figure showing gating for media control, peptide stimulated cells and anti-CD3 control.

| SE-AS | Before filtration |       | After filtration |       | % Content loss after filtration |            |
|-------|-------------------|-------|------------------|-------|---------------------------------|------------|
|       | Size              | PdI   | Size             | PdI   | Squalene                        | Tocopherol |
| 22    | 135.2             | 0.241 | 230.1            | 0.484 | 31.12                           | 32.38      |
| 36    | 173.3             | 0.283 | 371.3            | 0.619 | 45.12                           | 61.02      |

**Table S1.** Size of the emulsions before and after filtration and % content loss after filtration for SE-AS 22 and 36.

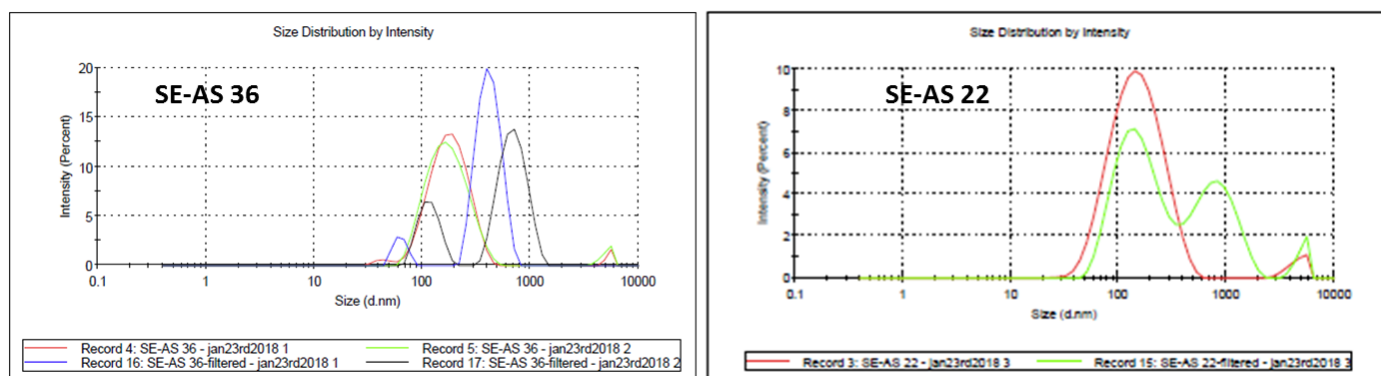

**Figure S3.** Bimodal size distribution after filtration through 0.22 $\mu$  PES filter. Graphs in red & green for SE-AS 36 are before filtration, and those in blue and black are post filtration. For SE-AS 22, red is before and green is after filtration.

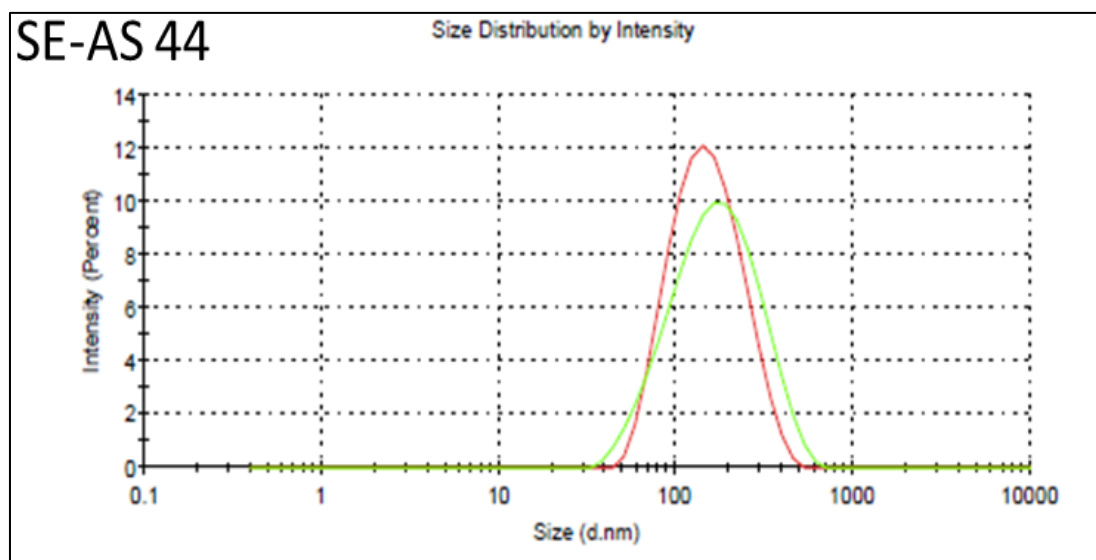

**Figure S4.** Size distribution by intensity for SE-AS 44, showing distribution pre- (red curve) and post- (green curve) filtration.

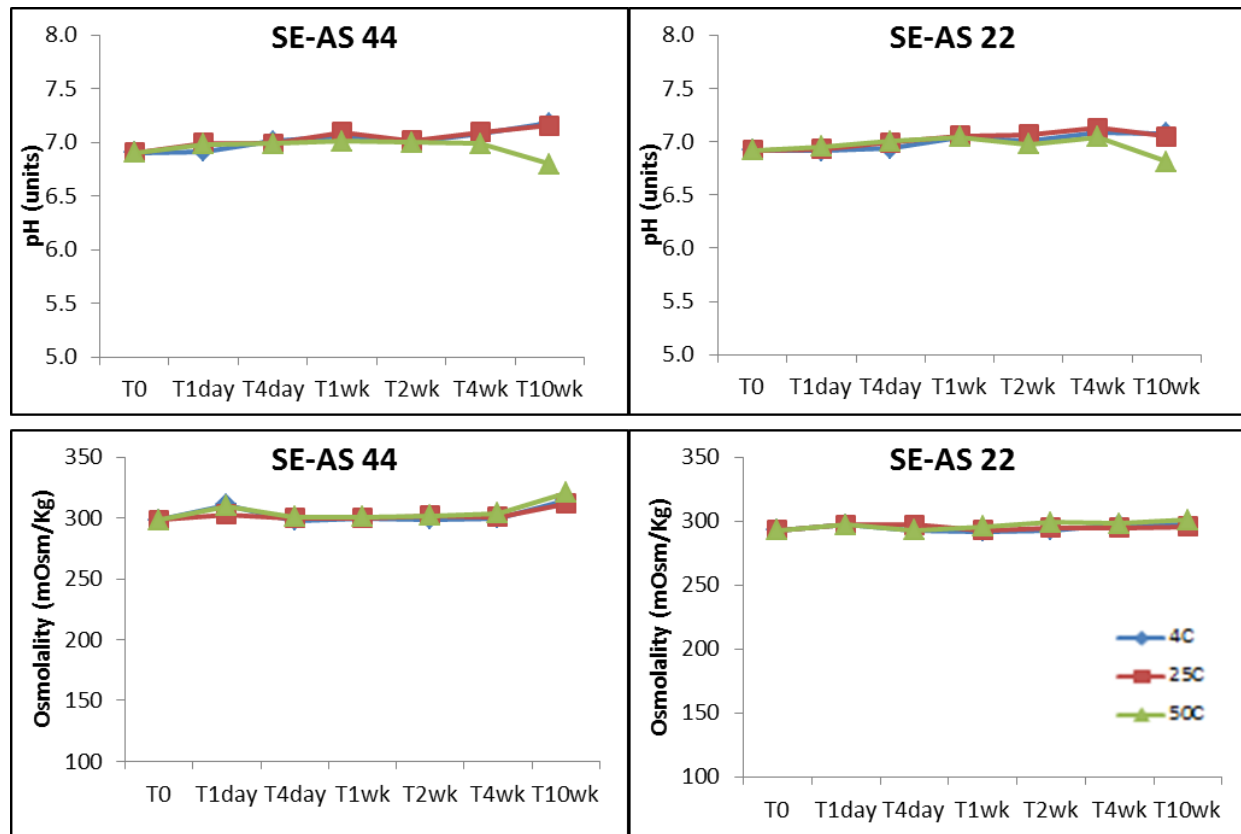

Figure S5. pH and Osmolality for emulsions stored at 4C (blue), 25C (red) and 50C (green) for up to 10 weeks.

| (a) Overall CD4+ T cells         | CM Q2 | EM Q2 | E Q4  |       |
|----------------------------------|-------|-------|-------|-------|
| Neg. Control                     | 0.010 | 0.006 | 0.005 |       |
| Unadjuvanted CMV                 | 0.013 | 0.152 | 0.054 |       |
| SE-AS 44                         | 0.010 | 0.310 | 0.073 |       |
| AS03                             | 0.020 | 0.323 | 0.044 |       |
| SEA160                           | 0.023 | 0.293 | 0.024 |       |
| (b) Th2-type CD4+ T cells        | CM Q2 | EM Q2 | E Q4  |       |
| Neg. Control                     | 0.002 | 0.000 | 0.000 |       |
| Unadjuvanted CMV                 | 0.006 | 0.128 | 0.039 |       |
| SE-AS 44                         | 0.008 | 0.235 | 0.053 |       |
| AS03                             | 0.012 | 0.213 | 0.028 |       |
| SEA160                           | 0.015 | 0.199 | 0.016 |       |
| (c) EFFECTOR MEMORY CD4+ T cells | Th0   | Th1   | Th2   | Th17  |
| Neg. Control                     | 0.004 | 0.000 | 0.000 | 0.002 |
| Unadjuvanted CMV                 | 0.021 | 0.000 | 0.128 | 0.004 |
| SE-AS 44                         | 0.068 | 0.002 | 0.188 | 0.004 |
| AS03                             | 0.098 | 0.000 | 0.213 | 0.013 |
| SEA160                           | 0.086 | 0.002 | 0.199 | 0.006 |
| (d) EFFECTOR CD4+ T cells        | Th0   | Th1   | Th2   | Th17  |
| Neg. Control                     | 0.004 | 0.000 | 0.000 | 0.000 |
| Unadjuvanted CMV                 | 0.013 | 0.001 | 0.039 | 0.000 |
| SE-AS 44                         | 0.020 | 0.000 | 0.042 | 0.000 |
| AS03                             | 0.015 | 0.000 | 0.028 | 0.001 |
| SEA160                           | 0.008 | 0.000 | 0.016 | 0.001 |

Table S2. Frequency of antigen-specific CD4+ T cells corresponding to figure 4 in overall CD4+ T cell population further characterized into memory T cells (a), Th2-type CD4+ T cells (b), overall effector memory T-cells (c) and effector cells (d).
